# Supplementary material for: A supersensitive sensor for rutin detection based on multi-walled carbon nanotubes and gold nanoparticles modified carbon paste electrodes
Source: Royal Society of Chemistry journal article supplement (doi:10.1039/c2ay05930d), 2012-01-01
Supplement: c2ay05930d.pdf [file c2ay05930d.pdf]

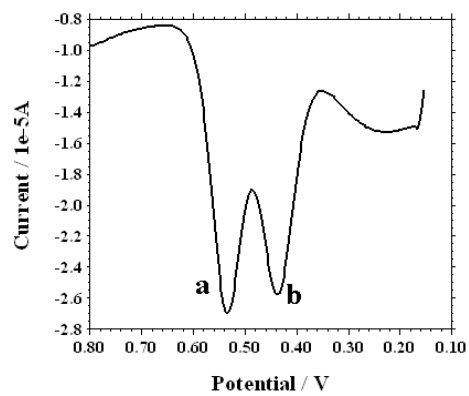

Fig.1 Square wave voltammograms of  $5 \times 10^{-7}$  mol L<sup>-1</sup> rutin (a) and  $5 \times 10^{-6}$  mol L<sup>-1</sup> quercetin (b) in NaAc-HAc (pH 4) at AuNPs/CNT/CPE. Other parameters are the same as Fig.7.
